# Supplementary material for: Chiral nanoparticle separation and discrimination using radially polarized circular Airy vortex beams with orbital-induced spin angular momentum
Source: Royal Society of Chemistry journal article supplement (doi:10.1039/d3cp04473d), 2024-01-01
Supplement: d3cp04473d1.pdf [file d3cp04473d1.pdf]

## Supporting Information of manuscript CP-ART-09-2023-004473

### Chiral nanoparticles separation and discrimination by radially polarized circular Airy vortex beams with orbital-induced spin angular momentum

Hao Wu,<sup>\*a</sup> Tao Wang<sup>a</sup> and Yi Hu<sup>\*b</sup>

<sup>a</sup> Department of Physics, Sichuan Normal University, Chengdu 610068, PR China.

<sup>b</sup> The MOE Key Laboratory of Weak-Light Nonlinear Photonics, TEDA Applied Physics Institute and School of Physics, Nankai University, Tianjin 300457, PR China.

E-mail: wuhaozealer@sicnu.edu.cn; yihu@nankai.edu.cn

#### 1. Transverse optical forces acting on chiral particles across various longitudinal planes of the RPCAVB

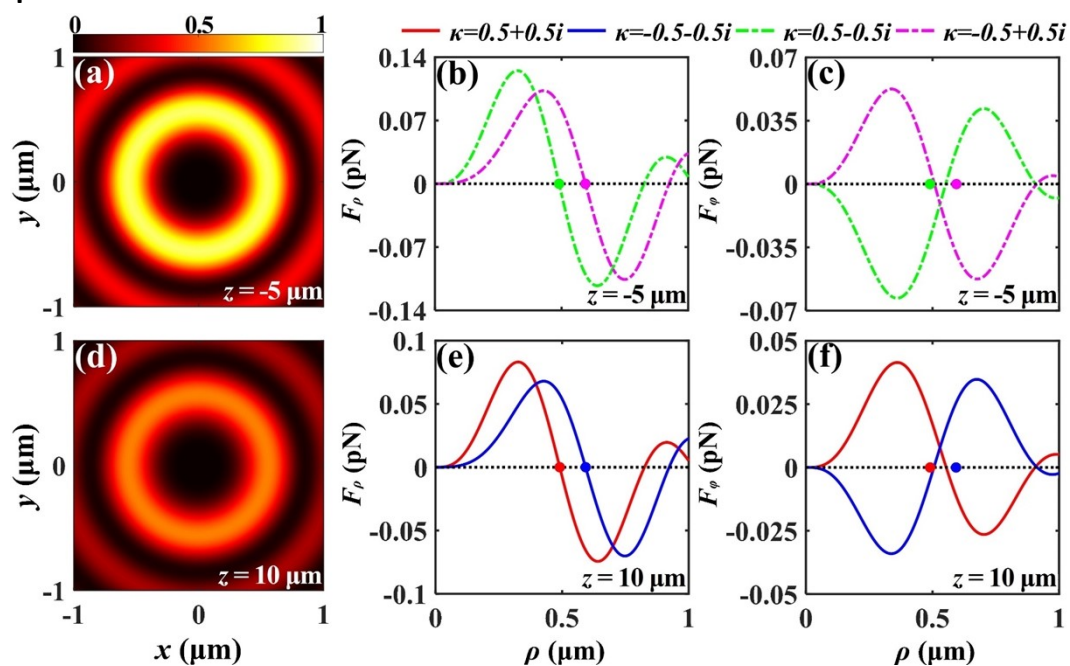

Fig. S1. (a,d) Transverse intensity profiles of the tightly focused RPCAVB with  $l=3$  on different longitudinal planes. (b,e) Radial and (c,f) azimuthal optical forces exerted by the RPCAVB on two groups of opposite enantiomers on different longitudinal planes. Red, blue, green and magenta dots represent the radial trapping positions of the chiral particles with  $\kappa = 0.5 + 0.5i$ ,  $\kappa = -0.5 - 0.5i$ ,  $\kappa = 0.5 - 0.5i$  and  $\kappa = -0.5 + 0.5i$ , respectively. Panels (a) and (d) are normalized by the RPCAVB's maximum intensity value on the focal plane.

## 2. Azimuthal optical forces exerted by RPCAVBs with opposite topological charges on chiral particles

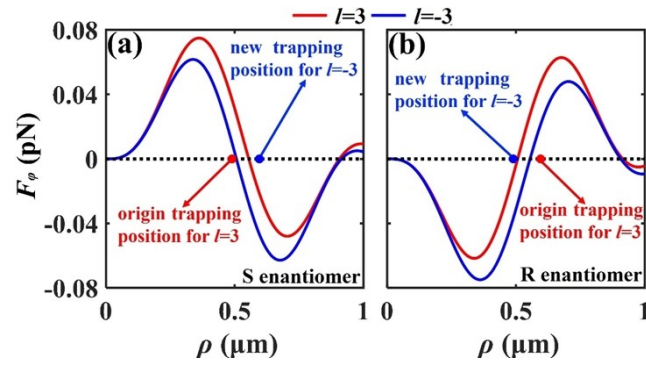

Fig. S2. Azimuthal optical forces along the radial direction for S and R enantiomers immersed in tightly focused RPCAVBs with  $l = \pm 3$ .
