# Supplementary figures and images for: Chiral nanoparticle separation and discrimination using radially polarized circular Airy vortex beams with orbital-induced spin angular momentum
Source: Royal Society of Chemistry journal article supplement (doi:10.1039/d3cp04473d), 2024-01-01

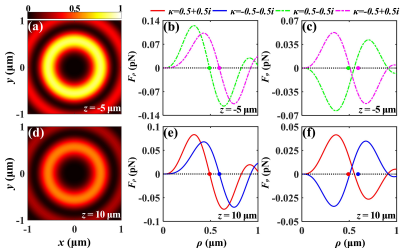

Supplement: d3cp04473d3.pdf [file d3cp04473d3.pdf]

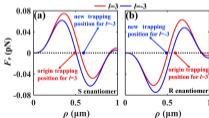

Supplement: d3cp04473d4.pdf [file d3cp04473d4.pdf]
